# Supplementary material for: Clinical and Demographic Factors Associated With Diabetic Retinopathy Among Young Patients With Diabetes
Source: PubMed Central journal article supplement (PMC8477260; doi:10.1001/jamanetworkopen.2021.26126), 2021-09-27
Supplement: jamanetwopen-e2126126-s001.pdf [file jamanetwopen-e2126126-s001.pdf]

## Supplementary Online Content

Ferm ML, DeSalvo DJ, Prichett LM, Sickler JK, Wolf RM, Channa R. Clinical and demographic factors associated with diabetic retinopathy among young patients with diabetes. *JAMA Netw Open*. 2021;4(9):e2126126. doi:10.1001/jamanetworkopen.2021.26126

**eTable.** Multivariable Regression Analysis of Patients With Diabetic Retinopathy as Outcome Excluding Insurance

This supplementary material has been provided by the authors to give readers additional information about their work.

**eTable.** Multivariable Regression Analysis of Patients With Diabetic Retinopathy as Outcome Excluding Insurance

| <b>T1D (n=1207)</b>         | Odds Ratio (95% Confidence Interval) | Standard Error | z      | P> z             |
|-----------------------------|--------------------------------------|----------------|--------|------------------|
| Duration of Diabetes        | 1.172 (1.093-1.256)                  | 0.041          | 4.480  | <b>&lt;0.001</b> |
| <i>Race (categorical)</i>   |                                      |                |        |                  |
| White (NH)                  | Reference                            |                |        |                  |
| Black/African American (NH) | 1.843 (0.867-3.918)                  | 0.709          | 1.590  | 0.11             |
| Hispanic/Other              | 0.635 (0.266-1.517)                  | 0.282          | -1.020 | 0.31             |
| Mean HbA1c                  | 1.168 (0.996-1.369)                  | 0.095          | 1.910  | 0.06             |
| Pump (y)                    | 0.440 (0.204-0.948)                  | 0.172          | -2.100 | <b>0.04</b>      |

| <b>T2D (n=376)</b>          | Odds Ratio (95% Confidence Interval) | Standard Error | z      | P> z         |
|-----------------------------|--------------------------------------|----------------|--------|--------------|
| Duration of Diabetes        | 1.259 (1.076-1.474)                  | 0.101          | 2.870  | <b>0.004</b> |
| <i>Race (categorical)</i>   |                                      |                |        |              |
| White (NH)                  | Reference                            |                |        |              |
| Black/African American (NH) | 0.927 (0.274-3.138)                  | 0.577          | -0.120 | 0.90         |
| Hispanic/Other              | 1.000                                | (omitted)      |        |              |
| Mean HbA1c                  | 1.035 (0.837-1.280)                  | 0.112          | 0.320  | 0.75         |

T1D = type 1 diabetes, T2D = type 2 diabetes, DR = diabetic retinopathy, NH = non-Hispanic, HbA1c = hemoglobin A1c
